# Supplementary material
Source: PubMed Central journal article supplement (PMC4276514)

Figure S1

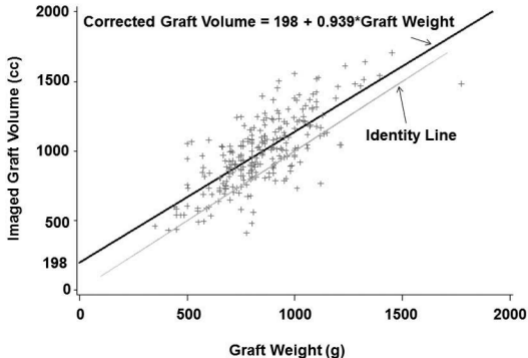

Figure S2a

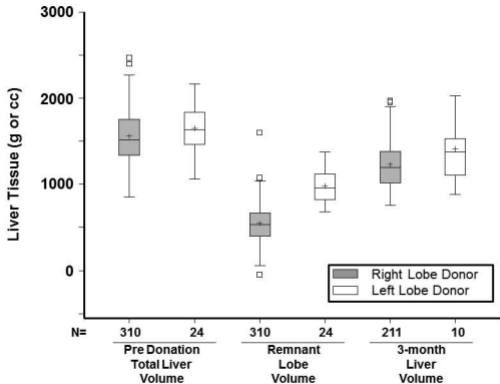

Figure S2b

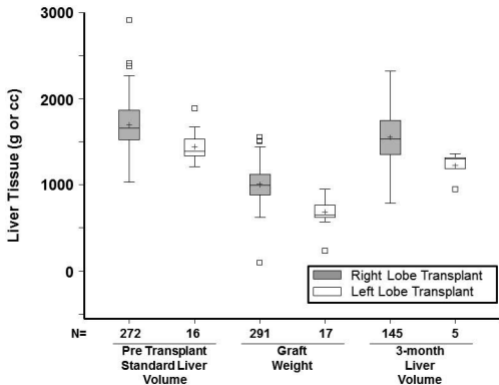

Supplement: NIHMS618513-supplement-Supp_FigureS1-S2.pdf [file NIHMS618513-supplement-Supp_FigureS1-S2.pdf]
